# Supplementary material for: Promoting Undergraduate Interest, Preparedness, and Professional Pursuit in the Sciences: An Outcomes Evaluation of the SURE Program at Emory University
Source: Atypon-hosted journal article supplement (doi:10.1187/cbe.09-08-0057), 2010-06-01
Supplement: supplemental_material_1.pdf [file supplemental_material_1.pdf]

## Appendix 1. SURE Research Proposal Guidelines & Checklist

|                                                                                                                                                                                                                                                                                                                                                                                                                                                                                                                                                                                                                                                                                                                                                                                                                                                                                                                                                                                                                                                                                                                                                                                                                                                                                                                                                                                                                                                                                                                                                                                                                                                                                                                                                                                                                                                                                     |                                                                                                                                                                                                                                                                                                                                                                                                                                                                                                                                                                                                                  |
|-------------------------------------------------------------------------------------------------------------------------------------------------------------------------------------------------------------------------------------------------------------------------------------------------------------------------------------------------------------------------------------------------------------------------------------------------------------------------------------------------------------------------------------------------------------------------------------------------------------------------------------------------------------------------------------------------------------------------------------------------------------------------------------------------------------------------------------------------------------------------------------------------------------------------------------------------------------------------------------------------------------------------------------------------------------------------------------------------------------------------------------------------------------------------------------------------------------------------------------------------------------------------------------------------------------------------------------------------------------------------------------------------------------------------------------------------------------------------------------------------------------------------------------------------------------------------------------------------------------------------------------------------------------------------------------------------------------------------------------------------------------------------------------------------------------------------------------------------------------------------------------|------------------------------------------------------------------------------------------------------------------------------------------------------------------------------------------------------------------------------------------------------------------------------------------------------------------------------------------------------------------------------------------------------------------------------------------------------------------------------------------------------------------------------------------------------------------------------------------------------------------|
| <p>Copyright © 2003-2009 Center for Science Education, Emory College</p>                                                                                                                                                                                                                                                                                                                                                                                                                                                                                                                                                                                                                                                                                                                                                                                                                                                                                                                                                                                                                                                                                                                                                                                                                                                                                                                                                                                                                                                                                                                                                                                                                                                                                                                                                                                                            | <h3>SURE Research Proposal Guidelines &amp; Checklist</h3> <p><u>Length</u>: 3 pages maximum (one additional page allowable for figures but not required); your proposal should include all items outlined below.</p> <p><u>Margins and Font</u>: 0.75 inches minimum margins; 10 point and larger</p> <p><u>Spacing</u>: single or space and a half</p> <p><u>Other</u>: applicant's name and page number should appear on each page</p> <p><b>Remember</b>: in addition to the proposal, you must submit your application form, online form, a transcript, and a letter of recommendation by the deadline.</p> |
| <p><b>Applicant's Name:</b></p> <p><b>Applicant's E-mail address:</b></p> <p><b>I. Proposal Title</b></p> <p><b>II. Proposal Abstract</b> (200 word max.)</p> <p><b>III. Proposal Detail</b></p> <ul style="list-style-type: none"><li><b>a. Background</b></li><li><b>b. Clearly stated hypothesis or project goal</b></li><li><b>c. Methodology / Experimental design</b></li><li><b>d. Data analysis</b> (proposed statistics)</li><li><b>e. Foreseeable technical difficulties</b></li><li><b>f. Timeline</b> (start and end dates; for SURE applicants, week-by week break-down)</li><li><b>g. Project goal</b> – whether publication, presentation, senior thesis, report for research for credit</li><li><b>h. References / Literature Cited</b> (5 maximum)</li></ul> <p><b>IV. Resources Needed</b> – briefly address the following:</p> <ul style="list-style-type: none"><li><b>a. Technical assistance</b> (Expertise contacts for science background, statistical analysis, etc.)</li><li><b>b. Budget</b> (available vs. unmet need, if applicable; this is to help you consider resource limitations; the SURE program does not have additional funding for materials or laboratory fees beyond the stipend the student receives)</li><li><b>c. Other logistics</b> (transportation, time constraints, assistance or equipment needed)</li><li><b>d. Institutional approval</b> – radiation safety training, use of animals training, scientific collection permits, vaccinations or titers required, etc. <i>Your faculty mentor will help you determine what is needed. All requirements must be met before you begin working on your project</i></li></ul> <p><b>V. Mentor's Name and Department</b> (it is understood the mentor has seen the final draft of the proposal and his/her approval is implied with the submission of a letter of recommendation)</p> |                                                                                                                                                                                                                                                                                                                                                                                                                                                                                                                                                                                                                  |
