# Supplementary material for: Promoting Undergraduate Interest, Preparedness, and Professional Pursuit in the Sciences: An Outcomes Evaluation of the SURE Program at Emory University
Source: Atypon-hosted journal article supplement (doi:10.1187/cbe.09-08-0057), 2010-06-01
Supplement: supplemental_material_2.pdf [file supplemental_material_2.pdf]

## Appendix 2. Online Follow-up Survey Instrument<sup>1</sup>

### Post-Graduate Activities and Employment

1. Thinking about the year after you graduated, what was the main activity you pursued?
  - a. Full-time employment
  - b. Graduate school
  - c. Took time off to “re-group,” travel, volunteer, etc.
  - d. Other: \_\_\_\_\_
  - e. Not applicable
  
2. What is your current employment status?
  - a. Employed, full-time (at least 35 hours per week)
  - b. Employed, part-time (less than 35 hours per week)
  - c. Unemployed and seeking employment
  - d. Homemaker, not seeking employment outside the home
  - e. Not employed and not seeking employment
  - f. Other: \_\_\_\_\_
  
3. If you are currently employed (full- or part-time), what do you do (position, field, setting, etc.)?  
\_\_\_\_\_
  
4. How satisfied are you with your current position?
  - a. Very dissatisfied
  - b. Somewhat dissatisfied
  - c. Satisfied
  - d. Very satisfied
  
5. What is your current personal income?
  - a. Less than \$15,000
  - b. \$15,000-\$24,999
  - c. \$25,000-\$49,999
  - d. \$50,000-\$99,999
  - e. \$100,000-\$199,999
  - f. \$200,000 or more

### Educational Background

6. What was your undergraduate major?  
\_\_\_\_\_
  
7. What was your overall undergraduate GPA?  
\_\_\_\_\_
  
8. If you completed your undergraduate degree, please tell us the degree title, discipline/area, and year of completion (using the drop-down menus below).

[OPTIONS ON DROP-DOWN MENUS]

---

<sup>1</sup> Questions eliciting socio-demographic information (e.g., gender, race/ethnicity, etc.) are not included in this appendix.

**Degrees**

BA  
BS  
MA  
MBA  
MFA  
MPH  
MSW  
RN  
PhD  
ScD  
MD  
JD  
LLM

**Areas/Disciplines**

Agriculture  
Anthropology  
Architecture  
Arts/Music  
Astronomy  
Biology  
Business  
Chemistry  
Computer Science  
Dentistry  
Earth science  
Economics  
Education

Engineering  
Film Studies  
Geography  
History  
Journal./Mass Comn.  
Law  
Library/Info. Science  
Linguistics  
Literature  
Mathematics  
Medicine  
Nursing  
Pharmacology  
Philosophy

Physical Education  
Physical Therapy  
Physics  
Political Science  
Psychology  
Public Affairs  
Public Health  
Religious Studies  
Social Work  
Sociology  
Veterinary Medicine  
Women's Studies

9. If the previous question didn't give you the right option (on the drop-down menu) to tell us about your undergraduate degree, please do so in the space below.

---

10. Next, please tell us about any other degrees or certifications you have completed. For each degree/certification, please use the drop-down menus to tell us the degree title, discipline/area, and year of completion.

11. If there are any other advanced/graduate degrees of certification you have completed but which were not mentioned on the previous question, please tell us about it (or them) in the box below.

---

12. Are you currently enrolled in an advanced/graduate degree or certificate program? If so, please tell us the degree and area/discipline in the space below.

---

13. If you are not currently enrolled as a student, do you plan to pursue another advanced degree, credentials, licenses, and/or certifications in the near future? If so, please tell us the degree and subject/discipline you intend to pursue.

---

14. How relevant has your undergraduate major been to your current career?

- highly relevant
- relevant
- slightly relevant
- irrelevant
- Not applicable

15. If you have ever taken the Graduate Record Examinations (GREs), please tell us the combined score and year of your most recent exam.

- Score: \_\_\_\_\_
- Year: \_\_\_\_\_

16. If you have ever taken the Medical College Admission Test (MCATs), please tell us the combined score and year of your most recent exam.

- Score: \_\_\_\_\_
- Year: \_\_\_\_\_

**SURE Impact**

17. Now we'd like to ask you about how your long-term interests and priorities may have changed during your SURE experience. Please rate your interest in each option below when you began and completed SURE.

[Rating scheme: very interested / interested / slightly interested / not interested]

|                                                                                                                     | <b>Level of Interest</b> |   |   |   |
|---------------------------------------------------------------------------------------------------------------------|--------------------------|---|---|---|
| Scientific research (generally)                                                                                     | 1                        | 2 | 3 | 4 |
| Doing a PhD in a scientific field                                                                                   | 1                        | 2 | 3 | 4 |
| Going to medical school                                                                                             | 1                        | 2 | 3 | 4 |
| Doing an MD/PhD program                                                                                             | 1                        | 2 | 3 | 4 |
| Getting a job in science education/K-12                                                                             | 1                        | 2 | 3 | 4 |
| Getting a job in science education/college                                                                          | 1                        | 2 | 3 | 4 |
| Getting a job in science writing/journalism                                                                         | 1                        | 2 | 3 | 4 |
| An academic career                                                                                                  | 1                        | 2 | 3 | 4 |
| A career in industry                                                                                                | 1                        | 2 | 3 | 4 |
| Pursuing a public health career                                                                                     | 1                        | 2 | 3 | 4 |
| Pursuing a career in dentistry                                                                                      | 1                        | 2 | 3 | 4 |
| Pursuing an allied health career (e.g., nursing, physician's assistant, genetics counselor, drug company rep, etc.) | 1                        | 2 | 3 | 4 |

18. Thinking back on your SURE research project...

Did you ever present your research at a scientific conference? If so, what conference? What year?

---

19. Did you ever publish your SURE research in a scholarly journal? If so, which journal? What year?

---

20. Now we'd like you to think back on some of your abilities at the beginning and end of the SURE program. Please rate your ability for each option below when you began and completed SURE.

[Rating scheme: strong ability / some ability / weak ability / no ability]

|                                                                                                          | <b>Ability</b> |   |   |   |
|----------------------------------------------------------------------------------------------------------|----------------|---|---|---|
| to conceptualize the objectives and hypotheses of scientific research                                    | 1              | 2 | 3 | 4 |
| to determine appropriate research methods (laboratory, interviews or otherwise) for scientific research  | 1              | 2 | 3 | 4 |
| to collect data using appropriate methods                                                                | 1              | 2 | 3 | 4 |
| to select an appropriate study design (for example, case-control, blinded, etc.) for scientific research | 1              | 2 | 3 | 4 |
| to select an appropriate strategy for the analysis of data                                               | 1              | 2 | 3 | 4 |
| to analyze data using a statistical software package                                                     | 1              | 2 | 3 | 4 |
| to apply principles of research ethics to scientific research                                            | 1              | 2 | 3 | 4 |
| to summarize data in the form of a poster presentation                                                   | 1              | 2 | 3 | 4 |
| to comprehend a published report of scientific research                                                  | 1              | 2 | 3 | 4 |
| to prepare an application for graduate school                                                            | 1              | 2 | 3 | 4 |
| to write a grant application                                                                             | 1              | 2 | 3 | 4 |
| to discuss research at a graduate school interview                                                       | 1              | 2 | 3 | 4 |
| to identify graduate funding                                                                             | 1              | 2 | 3 | 4 |
| to identify mentors                                                                                      | 1              | 2 | 3 | 4 |

21. Below is a list of abilities and types of knowledge that may have been addressed in the SURE program. In the first column, please indicate how important each skill or ability is for your current professional career and/or personal life. Then, in the second column, indicate how well SURE helped you developed the given skill or ability.

[Rating scheme: very important / important / slightly important / not important]

|                                                         | <b>Level of Importance</b> |
|---------------------------------------------------------|----------------------------|
| Think analytically                                      | 1 2 3 4                    |
| Formulate original ideas                                | 1 2 3 4                    |
| Analyze problems                                        | 1 2 3 4                    |
| Pose hypotheses                                         | 1 2 3 4                    |
| Evaluate data                                           | 1 2 3 4                    |
| Acquire new skills and knowledge                        | 1 2 3 4                    |
| Write effectively                                       | 1 2 3 4                    |
| Use computational tools                                 | 1 2 3 4                    |
| Present material orally                                 | 1 2 3 4                    |
| Develop awareness of societal problems                  | 1 2 3 4                    |
| Understand research ethics issues                       | 1 2 3 4                    |
| Evaluate research ethics problems                       | 1 2 3 4                    |
| Function independently, without supervision             | 1 2 3 4                    |
| Lead and supervise tasks and groups of people           | 1 2 3 4                    |
| Relate well to people of different cultural backgrounds | 1 2 3 4                    |
| Work effectively as a team member                       | 1 2 3 4                    |

22. The next set of questions concerns college science and mathematics research and internship experiences. For any of the following activities that you may have participated in as an undergraduate, please tell how important the activity was for your academic/professional development and career path. (Please note that the last four activities are for Emory graduates only.)

[Rating scheme: very important / important / slightly important / irrelevant]

|                                                 | <b>Importance for development/career path</b> |         |
|-------------------------------------------------|-----------------------------------------------|---------|
| Undergraduate research for credit               | 1 2 3 4                                       |         |
| Volunteer work at research laboratory           | 1 2 3 4                                       |         |
| Summer research off site                        | 1 2 3 4                                       |         |
| Honors research                                 | 1 2 3 4                                       |         |
| Independent study                               | 1 2 3 4                                       |         |
| Study abroad                                    | 1 2 3 4                                       |         |
| On campus research employment                   | 1 2 3 4                                       |         |
| Off campus research employment                  | 1 2 3 4                                       |         |
| ESEP (the elementary science education project) | 1 2 3 4                                       |         |
| j. Science honor societies or clubs             | 1 2 3 4                                       |         |
| k. Shadowing professional scientist             | 1 2 3 4                                       |         |
| Emory Progs                                     | Hughes Undergraduate Summer Institute         | 1 2 3 4 |
|                                                 | Hughes Freshman follow-up program (HUES)      | 1 2 3 4 |
|                                                 | ChemMentors                                   | 1 2 3 4 |
|                                                 | ChEmory                                       | 1 2 3 4 |

23. How important would you say your SURE experience was for your academic/professional development and career path?
- a. very important
  - b. important
  - c. slightly important
  - d. not important
